# Supplementary material for: ARACNe-based inference, using curated microarray data, of Arabidopsis thaliana root transcriptional regulatory networks
Source: PubMed Central journal article supplement (PMC4021103; doi:10.1186/1471-2229-14-97), 2014-04-16

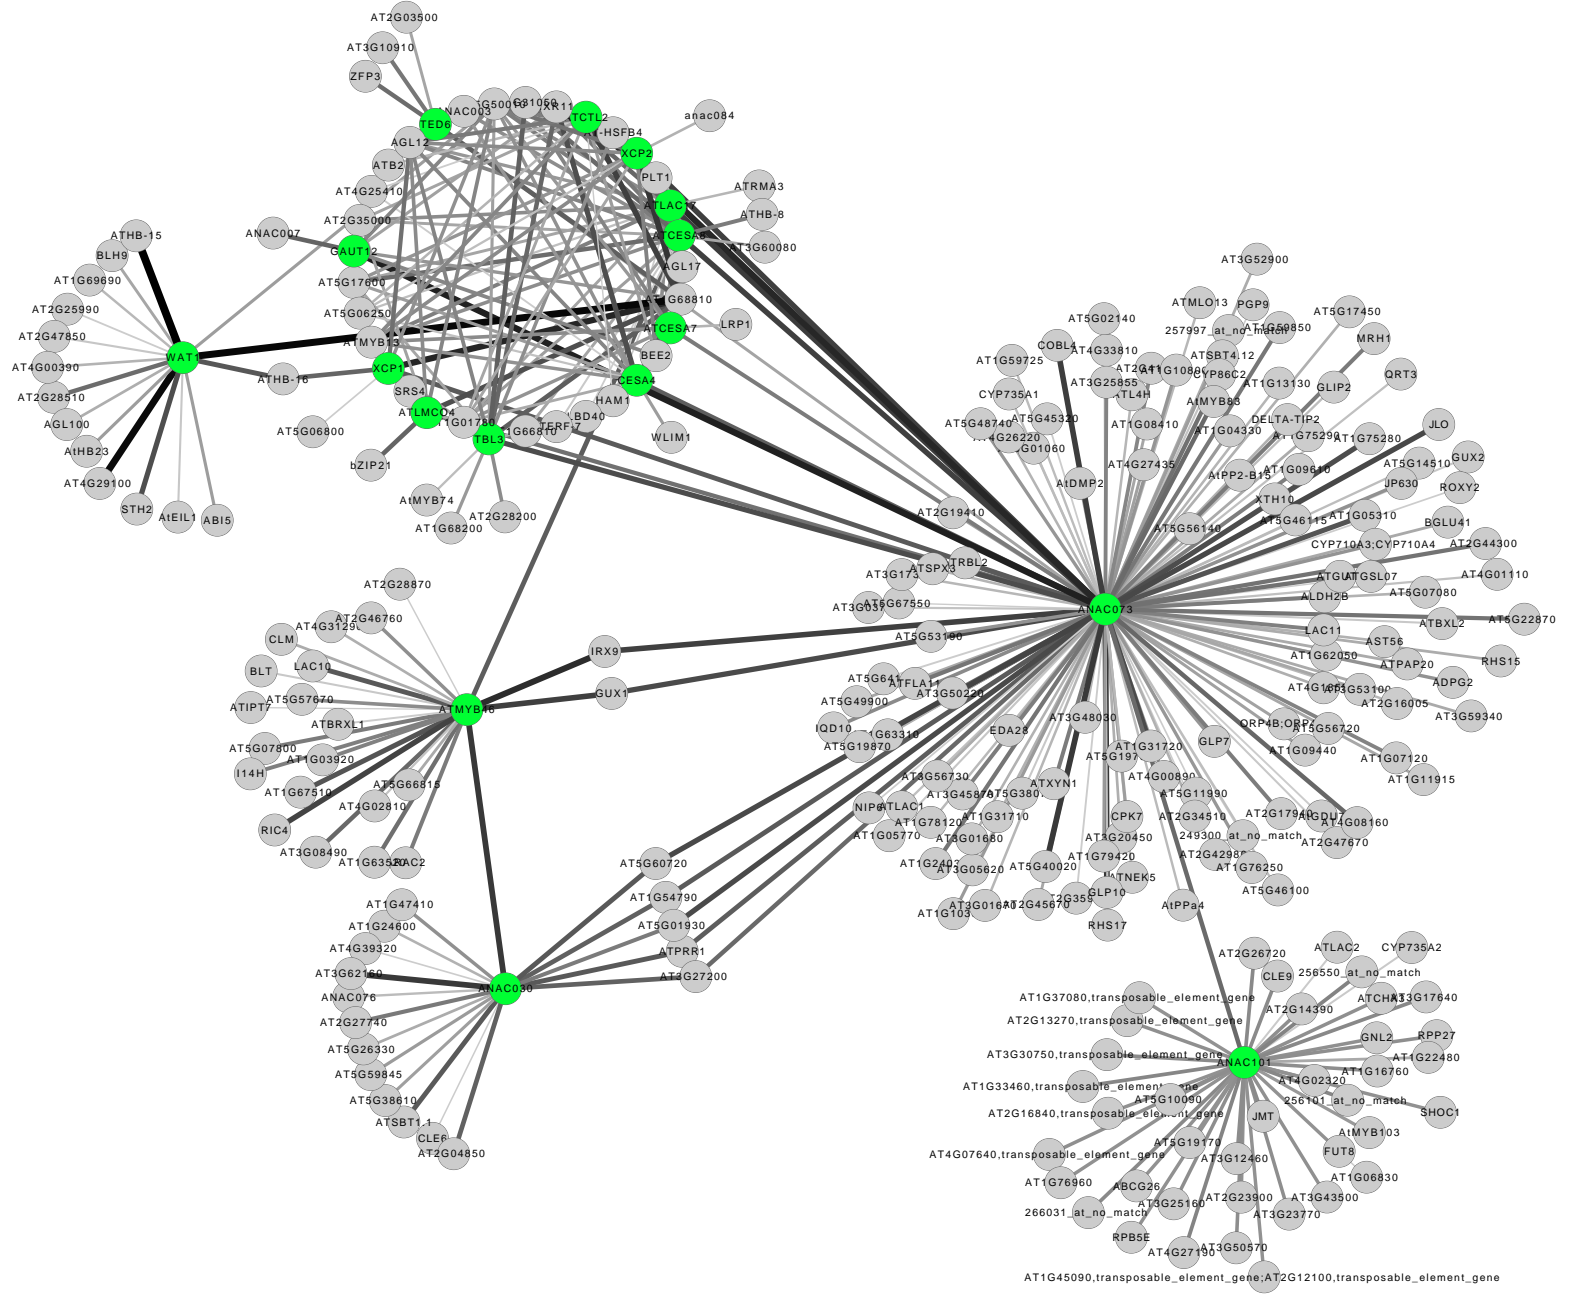

Supplement: 1471-2229-14-97-S6.pdf [file 1471-2229-14-97-S6.pdf]
